# Supplementary material for: Pseudomonas aeruginosa PAO 1 In Vitro Time–Kill Kinetics Using Single Phages and Phage Formulations—Modulating Death, Adaptation, and Resistance
Source: MDPI journal article supplement (doi:10.3390/antibiotics10070877), 2021-07-19
Supplement: s1 [file s1]

**Table S1.** Clusters and number of singletons formed using OrthoVenn2 by the different phages used in this work

| Phage        | Proteins | Clusters | Singletons |
|--------------|----------|----------|------------|
| <b>SPCB</b>  | 56       | 52       | 4          |
| <b>SPCG</b>  | 53       | 52       | 1          |
| <b>SMS12</b> | 89       | 88       | 1          |
| <b>SMS21</b> | 88       | 88       | 0          |
| <b>SMS29</b> | 88       | 85       | 3          |

**Table S2.** Percentage of identity after MAFFT alignment (65% similarity (5.0/-4.0)) and tree building using PHYL (Hasegawa-Kishino-Yano substitution model, no bootstrapping/likelihood) of phage SPCB with other homologous phages

| Phage/Accession no. | EU056923    | Phage SPCB  | NC_017865   | LN610580    | NC_005045   | NC_011107   | NC_028836 | NC_010326 | NC_022746 | NC_022091 | NC_027375 | MH107770 | NC_026602 | NC_012418 | NC_009935 | MH979674 | NC_016764 | NC_042104 |
|---------------------|-------------|-------------|-------------|-------------|-------------|-------------|-----------|-----------|-----------|-----------|-----------|----------|-----------|-----------|-----------|----------|-----------|-----------|
| EU056923            |             | <b>99.1</b> | 99.1        | 97.8        | 94.8        | 94.1        | 91.3      | 90.7      | 91        | 88.8      | 89.5      | 88.1     | 88.3      | 87.6      | 84.4      | 61.6     | 35.3      | 34.4      |
| <b>Phage SPCB</b>   | <b>99.1</b> |             | <b>98.4</b> | <b>97.1</b> | <b>94.2</b> | <b>93.3</b> | 91.1      | 90.4      | 90.6      | 88.5      | 89        | 87.8     | 87.9      | 87.6      | 84.2      | 61.2     | 35.2      | 34.3      |
| NC_017865           | 99.1        | <b>98.4</b> |             | 98.3        | 94.2        | 94.2        | 91.5      | 91        | 91.3      | 89.1      | 89.7      | 88.5     | 88.4      | 88        | 84.2      | 61.9     | 35.3      | 34.3      |
| LN610580            | 97.8        | <b>97.1</b> | 98.3        |             | 92.9        | 93.6        | 92.4      | 92.2      | 91.2      | 89.1      | 89.8      | 88.9     | 88.3      | 88.9      | 83.8      | 62.3     | 35.4      | 34.5      |
| NC_005045           | 94.8        | <b>94.2</b> | 94.2        | 92.9        |             | 96.8        | 88        | 88.2      | 88.4      | 89.9      | 90.1      | 85.5     | 85.8      | 85.1      | 82.1      | 60       | 34.9      | 34.1      |
| NC_011107           | 94.1        | <b>93.3</b> | 94.2        | 93.6        | 96.8        |             | 90.1      | 89.8      | 89.8      | 91.4      | 91.4      | 86.6     | 86.3      | 85.3      | 82.7      | 60.4     | 35.1      | 34        |
| NC_028836           | 91.3        | 91.1        | 91.5        | 92.4        | 88          | 90.1        |           | 91.2      | 89.7      | 88.3      | 87.8      | 88.5     | 89.3      | 85.6      | 82.5      | 63.6     | 35.6      | 34.4      |
| NC_010326           | 90.7        | 90.4        | 91          | 92.2        | 88.2        | 89.8        | 91.2      |           | 93.8      | 89.1      | 88.1      | 87.2     | 86.2      | 88.1      | 82.5      | 62       | 35.2      | 34        |
| NC_022746           | 91          | 90.6        | 91.3        | 91.2        | 88.4        | 89.8        | 89.7      | 93.8      |           | 91.7      | 91.4      | 88.6     | 87.8      | 88.5      | 83.8      | 62.2     | 35.3      | 34.4      |
| NC_022091           | 88.8        | 88.5        | 89.1        | 89.1        | 89.9        | 91.4        | 88.3      | 89.1      | 91.7      |           | 93.6      | 86.5     | 87.9      | 85.3      | 81.7      | 61       | 35        | 34        |
| NC_027375           | 89.5        | 89          | 89.7        | 89.8        | 90.1        | 91.4        | 87.8      | 88.1      | 91.4      | 93.6      |           | 85.9     | 85.7      | 85.5      | 83.9      | 61.4     | 35.2      | 34.2      |
| MH107770            | 88.1        | 87.8        | 88.5        | 88.9        | 85.5        | 86.6        | 88.5      | 87.2      | 88.6      | 86.5      | 85.9      |          | 86.8      | 85.2      | 81        | 60.9     | 35.7      | 34.2      |
| NC_026602           | 88.3        | 87.9        | 88.4        | 88.3        | 85.8        | 86.3        | 89.3      | 86.2      | 87.8      | 87.9      | 85.7      | 86.8     |           | 85.3      | 83.1      | 61.1     | 35.5      | 34.4      |
| NC_012418           | 87.6        | 87.6        | 88          | 88.9        | 85.1        | 85.3        | 85.6      | 88.1      | 88.5      | 85.3      | 85.5      | 85.2     | 85.3      |           | 82.6      | 59.4     | 35.3      | 34.6      |
| NC_009935           | 84.4        | 84.2        | 84.2        | 83.8        | 82.1        | 82.7        | 82.5      | 82.5      | 83.8      | 81.7      | 83.9      | 81       | 83.1      | 82.6      |           | 59.1     | 34.9      | 33.9      |
| MH979674            | 61.6        | 61.2        | 61.9        | 62.3        | 60          | 60.4        | 63.6      | 62        | 62.2      | 61        | 61.4      | 60.9     | 61.1      | 59.4      | 59.1      |          | 25.9      | 23.3      |
| NC_016764           | 35.3        | 35.2        | 35.3        | 35.4        | 34.9        | 35.1        | 35.6      | 35.2      | 35.3      | 35        | 35.2      | 35.7     | 35.5      | 35.3      | 34.9      | 25.9     |           | 51.7      |
| NC_042104           | 34.4        | 34.3        | 34.3        | 34.5        | 34.1        | 34          | 34.4      | 34        | 34.4      | 34        | 34.2      | 34.2     | 34.4      | 34.6      | 33.9      | 23.3     | 51.7      |           |

In **bold**, the five hits with the highest identity percentage. In grey is highlighted the row/column representing phage SPCB

**Table S3.** Percentage of identity after MAFFT alignment (65% similarity (5.0/-4.0)) and tree building using PHYML (Hasegawa-Kishino-Yano substitution model, no bootstrapping/likelihood) of phage SPCG with other homologous phages

| Phage/Accession no. | EU056923    | KX711710    | NC_017865   | Phage SPCG  | KU743887    | NC_005045   | NC_011107 | KY618819 | NC_022746 | NC_010326 | NC_022091 | NC_027375 | NC_028836 | MH107770 | NC_026602 | NC_012418 | NC_009935 | MH979674 | MG845683 | NC_013638 | NC_009936 | NC_030923 |
|---------------------|-------------|-------------|-------------|-------------|-------------|-------------|-----------|----------|-----------|-----------|-----------|-----------|-----------|----------|-----------|-----------|-----------|----------|----------|-----------|-----------|-----------|
| EU056923            |             | 98.6        | 99.1        | <b>96.9</b> | 95.3        | 94.8        | 94.1      | 91       | 90.3      | 89.6      | 88.9      | 89.6      | 90.6      | 87.6     | 87.9      | 87        | 84        | 62       | 49.7     | 43.6      | 42.3      | 33.9      |
| KX711710            | 98.6        |             | 99.5        | <b>96.1</b> | 94.7        | 94.3        | 94.3      | 91.1     | 90.5      | 89.9      | 89.1      | 89.6      | 90.8      | 88       | 87.8      | 87.2      | 83.8      | 62.3     | 49.6     | 43.6      | 42.3      | 34        |
| NC_017865           | 99.1        | 99.5        |             | <b>96.2</b> | 94.7        | 94.2        | 94.2      | 91.2     | 90.6      | 89.9      | 89.1      | 89.8      | 90.9      | 88       | 88        | 87.3      | 83.9      | 62.3     | 49.7     | 43.6      | 42.3      | 34        |
| <b>Phage SPCG</b>   | <b>96.9</b> | <b>96.1</b> | <b>96.2</b> |             | <b>95.1</b> | <b>92.4</b> | 92.3      | 89.3     | 88.8      | 88.2      | 87.3      | 88        | 90.8      | 87.6     | 87.9      | 85.4      | 83.3      | 62       | 50       | 43.4      | 42.2      | 33.8      |
| KU743887            | 95.3        | 94.7        | 94.7        | <b>95.1</b> |             | 96.3        | 95.3      | 89.5     | 88.7      | 88.3      | 90.1      | 90.4      | 89.3      | 86.6     | 86.7      | 85.4      | 82.3      | 60.7     | 50       | 43.5      | 42.1      | 33.7      |
| NC_005045           | 94.8        | 94.3        | 94.2        | <b>92.4</b> | 96.3        |             | 96.8      | 89.6     | 88.6      | 88.1      | 89.7      | 90        | 87.8      | 85.4     | 85.8      | 85        | 82        | 60.8     | 49.2     | 43.1      | 41.8      | 33.5      |
| NC_011107           | 94.1        | 94.3        | 94.2        | 92.3        | 95.3        | 96.8        |           | 90.9     | 90        | 89.7      | 91.1      | 91.2      | 89.8      | 86.4     | 86.3      | 85.3      | 82.6      | 61.1     | 49.4     | 43.3      | 41.9      | 33.6      |
| KY618819            | 91          | 91.1        | 91.2        | 89.3        | 89.5        | 89.6        | 90.9      |          | 96.4      | 92.5      | 93.3      | 92.5      | 90        | 88.7     | 87.8      | 88.6      | 83.5      | 63.2     | 49.8     | 44        | 42.2      | 34.1      |
| NC_022746           | 90.3        | 90.5        | 90.6        | 88.8        | 88.7        | 88.6        | 90        | 96.4     |           | 93.8      | 92.2      | 91.9      | 89.2      | 88.2     | 87.4      | 88.1      | 83.4      | 62.7     | 49.9     | 43.9      | 42.3      | 34.1      |
| NC_010326           | 89.6        | 89.9        | 89.9        | 88.2        | 88.3        | 88.1        | 89.7      | 92.5     | 93.8      |           | 89.4      | 88.5      | 90.7      | 86.5     | 85.7      | 87.7      | 82        | 62.5     | 49.3     | 43.4      | 41.9      | 33.7      |
| NC_022091           | 88.9        | 89.1        | 89.1        | 87.3        | 90.1        | 89.7        | 91.1      | 93.3     | 92.2      | 89.4      |           | 93.6      | 88.4      | 86.4     | 87.8      | 85.4      | 81.8      | 61.8     | 49.6     | 43.6      | 41.9      | 33.9      |
| NC_027375           | 89.6        | 89.6        | 89.8        | 88          | 90.4        | 90          | 91.2      | 92.5     | 91.9      | 88.5      | 93.6      |           | 87.9      | 86       | 85.6      | 85.6      | 83.8      | 62.2     | 49.6     | 43.6      | 42        | 33.9      |
| NC_028836           | 90.6        | 90.8        | 90.9        | 90.8        | 89.3        | 87.8        | 89.8      | 90       | 89.2      | 90.7      | 88.4      | 87.9      |           | 88.6     | 89.4      | 85.5      | 82.4      | 64.5     | 50.4     | 43.6      | 42.2      | 34        |
| MH107770            | 87.6        | 88          | 88          | 87.6        | 86.6        | 85.4        | 86.4      | 88.7     | 88.2      | 86.5      | 86.4      | 86        | 88.6      |          | 87        | 85        | 81.1      | 61.8     | 49.6     | 43.2      | 41.4      | 33.5      |
| NC_026602           | 87.9        | 87.8        | 88          | 87.9        | 86.7        | 85.8        | 86.3      | 87.8     | 87.4      | 85.7      | 87.8      | 85.6      | 89.4      | 87       |           | 85.2      | 83.1      | 62       | 49.9     | 43.6      | 41.9      | 34        |
| NC_012418           | 87          | 87.2        | 87.3        | 85.4        | 85.4        | 85          | 85.3      | 88.6     | 88.1      | 87.7      | 85.4      | 85.6      | 85.5      | 85       | 85.2      |           | 82.4      | 60.1     | 49.5     | 43.6      | 42.1      | 33.9      |
| NC_009935           | 84          | 83.8        | 83.9        | 83.3        | 82.3        | 82          | 82.6      | 83.5     | 83.4      | 82        | 81.8      | 83.8      | 82.4      | 81.1     | 83.1      | 82.4      |           | 59.8     | 49.1     | 43.1      | 41.6      | 33.4      |
| MH979674            | 62          | 62.3        | 62.3        | 62          | 60.7        | 60.8        | 61.1      | 63.2     | 62.7      | 62.5      | 61.8      | 62.2      | 64.5      | 61.8     | 62        | 60.1      | 59.8      |          | 37.7     | 25.4      | 22.7      | 19.7      |
| MG845683            | 49.7        | 49.6        | 49.7        | 50          | 50          | 49.2        | 49.4      | 49.8     | 49.9      | 49.3      | 49.6      | 49.6      | 50.4      | 49.6     | 49.9      | 49.5      | 49.1      | 37.7     |          | 41.7      | 38.4      | 30.3      |
| NC_013638           | 43.6        | 43.6        | 43.6        | 43.4        | 43.5        | 43.1        | 43.3      | 44       | 43.9      | 43.4      | 43.6      | 43.6      | 43.6      | 43.2     | 43.6      | 43.6      | 43.1      | 25.4     | 41.7     |           | 39.1      | 28.3      |
| NC_009936           | 42.3        | 42.3        | 42.3        | 42.2        | 42.1        | 41.8        | 41.9      | 42.2     | 42.3      | 41.9      | 41.9      | 42        | 42.2      | 41.4     | 41.9      | 42.1      | 41.6      | 22.7     | 38.4     | 39.1      |           | 27.4      |
| NC_030923           | 33.9        | 34          | 34          | 33.8        | 33.7        | 33.5        | 33.6      | 34.1     | 34.1      | 33.7      | 33.9      | 33.9      | 34        | 33.5     | 34        | 33.9      | 33.4      | 19.7     | 30.3     | 28.3      | 27.4      |           |

In **bold**, the five hits with the highest identity percentage. In grey is highlighted the row/column representing phage SPCG.

**Table S4.** Percentage of identity after MAFFT alignment (65% similarity (5.0/-4.0)) and tree building using PHYML (Hasegawa-Kishino-Yano substitution model, no bootstrapping/likelihood) of phage SMS12 with other homologous phages

| Phage/Accession no. | AP019535 | MG897799 | KR054028 | NC_028971 | KU198331  | NC_011756   | NC_011703   | NC_017674   | Phage SMS12 | NC_028939 | NC_011166   | NC_041870 | MK340760 | NC_011165 | NC_007810 | NC_011810 | MK318076 | MN131141 | MN131142 | NC_026586 |
|---------------------|----------|----------|----------|-----------|-----------|-------------|-------------|-------------|-------------|-----------|-------------|-----------|----------|-----------|-----------|-----------|----------|----------|----------|-----------|
| AP019535            |          | 92.2     | 86.2     | 87.6      | 34.9      | 35          | 26.9        | 28.5        | 28.6        | 29        | 35.3        | 35.4      | 35.2     | 36.5      | 26.7      | 26.7      | 31.9     | 31.9     | 33.2     | 32.2      |
| MG897799            | 92.2     |          | 83.8     | 89.4      | 34.8      | 34.9        | 28.7        | 28.8        | 28.9        | 29.3      | 35.2        | 35.3      | 35.1     | 36.3      | 28.5      | 28.5      | 33.6     | 33.6     | 33.3     | 33.9      |
| KR054028            | 86.2     | 83.8     |          | 85.2      | 34.7      | 35.1        | 35.1        | 35.1        | 34.9        | 35.1      | 35.3        | 35.2      | 34.9     | 35        | 34.7      | 34.2      | 35.5     | 35.3     | 35.1     | 35.3      |
| NC_028971           | 87.6     | 89.4     | 85.2     |           | 34.8      | 35.3        | 35.3        | 35.3        | 35.1        | 35.2      | 35.5        | 35.3      | 35.1     | 35.1      | 34.9      | 34.4      | 35.7     | 35.5     | 35.3     | 35.5      |
| KU198331            | 34.9     | 34.8     | 34.7     | 34.8      |           | 94.7        | 91.8        | 93.2        | <b>92</b>   | 91.1      | 89.6        | 89.9      | 87.5     | 89.8      | 85.4      | 85        | 92.4     | 94.1     | 93       | 91.1      |
| NC_011756           | 35       | 34.9     | 35.1     | 35.3      | 94.7      |             | 93.9        | 94.7        | <b>94.3</b> | 91.6      | 92.4        | 92        | 88.4     | 90.5      | 86.1      | 84.1      | 94.4     | 95.2     | 94.4     | 92.6      |
| NC_011703           | 26.9     | 28.7     | 35.1     | 35.3      | 91.8      | 93.9        |             | 95.3        | <b>94.5</b> | 89.8      | 90.3        | 90.3      | 87.9     | 90.7      | 85.9      | 84.5      | 85       | 84.8     | 85.1     | 82        |
| NC_017674           | 28.5     | 28.8     | 35.1     | 35.3      | 93.2      | 94.7        | 95.3        |             | <b>95.4</b> | 89.2      | 91.1        | 90.6      | 88.2     | 90.9      | 85        | 83.5      | 84.4     | 85.1     | 85.1     | 82.1      |
| <b>Phage SMS12</b>  | 28.6     | 28.9     | 34.9     | 35.1      | <b>92</b> | <b>94.3</b> | <b>94.5</b> | <b>95.4</b> |             | 88.8      | <b>90.5</b> | 90.4      | 88       | 90.3      | 84.5      | 83.6      | 84.6     | 85.1     | 85       | 82.4      |
| NC_028939           | 29       | 29.3     | 35.1     | 35.2      | 91.1      | 91.6        | 89.8        | 89.2        | 88.8        |           | 89.4        | 89.8      | 88.6     | 89.8      | 86        | 85.1      | 81       | 80.6     | 80.5     | 79.9      |
| NC_011166           | 35.3     | 35.2     | 35.3     | 35.5      | 89.6      | 92.4        | 90.3        | 91.1        | <b>90.5</b> | 89.4      |             | 96.2      | 92.4     | 90.1      | 87        | 85.2      | 92.4     | 91.7     | 91.6     | 95        |
| NC_041870           | 35.4     | 35.3     | 35.2     | 35.3      | 89.9      | 92          | 90.3        | 90.6        | 90.4        | 89.8      | 96.2        |           | 92.3     | 90.2      | 87        | 85.7      | 92.6     | 92.3     | 91.7     | 95.1      |
| MK340760            | 35.2     | 35.1     | 34.9     | 35.1      | 87.5      | 88.4        | 87.9        | 88.2        | 88          | 88.6      | 92.4        | 92.3      |          | 89.7      | 89.5      | 88.2      | 89.7     | 88.8     | 88.5     | 92.3      |
| NC_011165           | 36.5     | 36.3     | 35       | 35.1      | 89.8      | 90.5        | 90.7        | 90.9        | 90.3        | 89.8      | 90.1        | 90.2      | 89.7     |           | 88.7      | 88        | 92.3     | 91.4     | 91       | 92.4      |
| NC_007810           | 26.7     | 28.5     | 34.7     | 34.9      | 85.4      | 86.1        | 85.9        | 85          | 84.5        | 86        | 87          | 87        | 89.5     | 88.7      |           | 93.3      | 77.9     | 76.8     | 77.1     | 78.6      |
| NC_011810           | 26.7     | 28.5     | 34.2     | 34.4      | 85        | 84.1        | 84.5        | 83.5        | 83.6        | 85.1      | 85.2        | 85.7      | 88.2     | 88        | 93.3      |           | 76.8     | 76.4     | 76.9     | 77.5      |
| MK318076            | 31.9     | 33.6     | 35.5     | 35.7      | 92.4      | 94.4        | 85          | 84.4        | 84.6        | 81        | 92.4        | 92.6      | 89.7     | 92.3      | 77.9      | 76.8      |          | 94.7     | 92.9     | 91.8      |
| MN131141            | 31.9     | 33.6     | 35.3     | 35.5      | 94.1      | 95.2        | 84.8        | 85.1        | 85.1        | 80.6      | 91.7        | 92.3      | 88.8     | 91.4      | 76.8      | 76.4      | 94.7     |          | 94.3     | 90.9      |
| MN131142            | 33.2     | 33.3     | 35.1     | 35.3      | 93        | 94.4        | 85.1        | 85.1        | 85          | 80.5      | 91.6        | 91.7      | 88.5     | 91        | 77.1      | 76.9      | 92.9     | 94.3     |          | 90.4      |
| NC_026586           | 32.2     | 33.9     | 35.3     | 35.5      | 91.1      | 92.6        | 82          | 82.1        | 82.4        | 79.9      | 95          | 95.1      | 92.3     | 92.4      | 78.6      | 77.5      | 91.8     | 90.9     | 90.4     |           |

In **bold**, the five hits with the highest identity percentage. In grey is highlighted the row/column representing phage SMS12.

**Table S5.** Percentage of identity after MAFFT alignment (65% similarity (5.0/-4.0)) and tree building using PHYML (Hasegawa-Kishino-Yano substitution model, no bootstrapping/likelihood) of phage SMS21 with other homologous phages

| Phage/Accession no. | Phage SMS21 | NC_017674 | NC_011703 | NC_011756 | KU198331 | NC_042079 | NC_041870 | NC_011166 | KX171208 | NC_019451 | MK340760 | NC_026586 | MN131143 | MN131141 | MN131142 | MK318076 | MF623055 | NC_042080 |
|---------------------|-------------|-----------|-----------|-----------|----------|-----------|-----------|-----------|----------|-----------|----------|-----------|----------|----------|----------|----------|----------|-----------|
| Phage SMS21         |             | 95.4      | 94.8      | 94.1      | 92.4     | 90.7      | 90.3      | 90.7      | 90.1     | 91.1      | 88.1     | 92.6      | 95.6     | 95.3     | 94.4     | 94.5     | 93.2     | 75.4      |
| NC_017674           | 95.4        |           | 95.5      | 94.3      | 93.5     | 90.4      | 90.5      | 91.2      | 89.8     | 92        | 88.1     | 92        | 95.3     | 95.2     | 94.3     | 94.1     | 93       | 75.6      |
| NC_011703           | 94.8        | 95.5      |           | 93.9      | 92.8     | 89.7      | 90.2      | 90.5      | 89.4     | 90.9      | 88       | 84        | 87.6     | 87.1     | 87.3     | 87.3     | 85.4     | 76        |
| NC_011756           | 94.1        | 94.3      | 93.9      |           | 94.7     | 90.7      | 91.2      | 91.8      | 90.8     | 91.9      | 87.9     | 92.8      | 95       | 95       | 94.2     | 94.1     | 92.7     | 64.4      |
| KU198331            | 92.4        | 93.5      | 92.8      | 94.7      |          | 89.8      | 90        | 89.8      | 88.8     | 91.6      | 87.8     | 91.5      | 93.8     | 93.9     | 92.8     | 92.2     | 91.3     | 62.7      |
| NC_042079           | 90.7        | 90.4      | 89.7      | 90.7      | 89.8     |           | 95.2      | 94.3      | 93.3     | 94.2      | 92.1     | 95.8      | 91.4     | 91.6     | 91.9     | 92.4     | 92.6     | 76.4      |
| NC_041870           | 90.3        | 90.5      | 90.2      | 91.2      | 90       | 95.2      |           | 96.2      | 94.4     | 94.6      | 92.3     | 95.2      | 91.8     | 92       | 91.7     | 92.2     | 92.2     | 77        |
| NC_011166           | 90.7        | 91.2      | 90.5      | 91.8      | 89.8     | 94.3      | 96.2      |           | 95.4     | 95.7      | 92.4     | 95.4      | 91.6     | 91.7     | 91.6     | 92.3     | 92.4     | 76.9      |
| KX171208            | 90.1        | 89.8      | 89.4      | 90.8      | 88.8     | 93.3      | 94.4      | 95.4      |          | 93.7      | 91.2     | 94.4      | 91       | 91.1     | 90.9     | 91.8     | 91.4     | 76        |
| NC_019451           | 91.1        | 92        | 90.9      | 91.9      | 91.6     | 94.2      | 94.6      | 95.7      | 93.7     |           | 91.3     | 95.2      | 92.1     | 92.2     | 91.6     | 91.8     | 92.8     | 75.9      |
| MK340760            | 88.1        | 88.1      | 88        | 87.9      | 87.8     | 92.1      | 92.3      | 92.4      | 91.2     | 91.3      |          | 92.1      | 88.4     | 88.7     | 88.5     | 89.5     | 89.1     | 74.6      |
| NC_026586           | 92.6        | 92        | 84        | 92.8      | 91.5     | 95.8      | 95.2      | 95.4      | 94.4     | 95.2      | 92.1     |           | 90.7     | 90.7     | 90.2     | 91.5     | 92       | 75.2      |
| MN131143            | 95.6        | 95.3      | 87.6      | 95        | 93.8     | 91.4      | 91.8      | 91.6      | 91       | 92.1      | 88.4     | 90.7      |          | 97.2     | 96.5     | 94       | 93.6     | 75.4      |
| MN131141            | 95.3        | 95.2      | 87.1      | 95        | 93.9     | 91.6      | 92        | 91.7      | 91.1     | 92.2      | 88.7     | 90.7      | 97.2     |          | 94.3     | 94.7     | 92.4     | 75.4      |
| MN131142            | 94.4        | 94.3      | 87.3      | 94.2      | 92.8     | 91.9      | 91.7      | 91.6      | 90.9     | 91.6      | 88.5     | 90.2      | 96.5     | 94.3     |          | 92.9     | 92.3     | 74.6      |
| MK318076            | 94.5        | 94.1      | 87.3      | 94.1      | 92.2     | 92.4      | 92.2      | 92.3      | 91.8     | 91.8      | 89.5     | 91.5      | 94       | 94.7     | 92.9     |          | 91.6     | 76.6      |
| MF623055            | 93.2        | 93        | 85.4      | 92.7      | 91.3     | 92.6      | 92.2      | 92.4      | 91.4     | 92.8      | 89.1     | 92        | 93.6     | 92.4     | 92.3     | 91.6     |          | 75.1      |
| NC_042080           | 75.4        | 75.6      | 76        | 64.4      | 62.7     | 76.4      | 77        | 76.9      | 76       | 75.9      | 74.6     | 75.2      | 75.4     | 75.4     | 74.6     | 76.6     | 75.1     |           |

In **bold**, the five hits with the highest identity percentage. In grey is highlighted the row/column representing phage SMS21.

**Table S6.** Percentage of identity after MAFFT alignment (65% similarity (5.0/-4.0)) and tree building using PHYML (Hasegawa-Kishino-Yano substitution model, no bootstrapping/likelihood) of phage SMS29 with other homologous phages

| Phage/Accession no. | Phage SMS29 | NC_017674   | GU815091    | NC_011703 | FM897211 | NC_011756 | FM887021 | KU198331 | NC_041865 | KX171208 | NC_019451 | KP340287 | NC_011810 | NC_007810 | NC_026586 | MN131143    | MN131141    | MN131142 | MK318076 | LT594786 |
|---------------------|-------------|-------------|-------------|-----------|----------|-----------|----------|----------|-----------|----------|-----------|----------|-----------|-----------|-----------|-------------|-------------|----------|----------|----------|
| Phage SMS29         | <b>95.5</b> | <b>95.5</b> | <b>95.5</b> | <b>95</b> | 95       | 94.7      | 94.7     | 92.4     | 90.8      | 90.4     | 91.1      | 91.8     | 84.1      | 85.1      | 92.2      | <b>95.5</b> | <b>95.5</b> | 94.4     | 94.7     | 93.9     |
| NC_017674           | <b>95.5</b> |             | 100         | 95.3      | 95.3     | 94.7      | 94.7     | 93.2     | 91        | 89.8     | 92.1      | 91.6     | 84.1      | 85.5      | 92        | 95.2        | 95.1        | 94.2     | 94.1     | 93.9     |
| GU815091            | <b>95.5</b> | 100         |             | 95.3      | 95.3     | 94.7      | 94.7     | 93.2     | 91        | 89.8     | 92.1      | 91.6     | 84.1      | 85.5      | 92        | 95.2        | 95.1        | 94.2     | 94.1     | 93.9     |
| NC_011703           | <b>95</b>   | 95.3        | 95.3        |           | 100      | 93.9      | 93.9     | 91.8     | 90.6      | 89.4     | 90.9      | 91       | 84.8      | 86.2      | 84.1      | 87.5        | 87          | 87.3     | 87.3     | 87.1     |
| FM897211            | 95          | 95.3        | 95.3        | 100       |          | 93.9      | 93.9     | 91.8     | 90.6      | 89.4     | 90.9      | 91       | 84.8      | 86.2      | 84.1      | 87.5        | 87          | 87.3     | 87.3     | 87.1     |
| NC_011756           | 94.7        | 94.7        | 94.7        | 93.9      | 93.9     |           | 100      | 94.7     | 92.3      | 91.3     | 92.5      | 93.4     | 84.7      | 86.7      | 92.6      | 95.1        | 95.2        | 94.4     | 94.3     | 94.8     |
| FM887021            | 94.7        | 94.7        | 94.7        | 93.9      | 93.9     | 100       |          | 94.7     | 92.3      | 91.3     | 92.5      | 93.4     | 84.7      | 86.7      | 92.6      | 95.1        | 95.2        | 94.4     | 94.3     | 94.8     |
| KU198331            | 92.4        | 93.2        | 93.2        | 91.8      | 91.8     | 94.7      | 94.7     |          | 89.7      | 88.7     | 91.4      | 91.1     | 85.5      | 86        | 91.1      | 93.9        | 94.1        | 92.9     | 92.3     | 93.9     |
| NC_041865           | 90.8        | 91          | 91          | 90.6      | 90.6     | 92.3      | 92.3     | 89.7     |           | 95       | 93.6      | 95       | 86.4      | 88.3      | 94.3      | 91.4        | 91.8        | 91.5     | 92.7     | 92.9     |
| KX171208            | 90.4        | 89.8        | 89.8        | 89.4      | 89.4     | 91.3      | 91.3     | 88.7     | 95        |          | 93.7      | 94.9     | 86.1      | 87.1      | 94.2      | 91          | 91.1        | 90.9     | 91.9     | 92.3     |
| NC_019451           | 91.1        | 92.1        | 92.1        | 90.9      | 90.9     | 92.5      | 92.5     | 91.4     | 93.6      | 93.7     |           | 96       | 85.4      | 87        | 94.9      | 92.1        | 92.2        | 91.6     | 91.8     | 93.2     |
| KP340287            | 91.8        | 91.6        | 91.6        | 91        | 91       | 93.4      | 93.4     | 91.1     | 95        | 94.9     | 96        |          | 86.2      | 87.6      | 95        | 92.5        | 92.6        | 92.1     | 92.1     | 93.4     |
| NC_011810           | 84.1        | 84.1        | 84.1        | 84.8      | 84.8     | 84.7      | 84.7     | 85.5     | 86.4      | 86.1     | 85.4      | 86.2     |           | 93.3      | 79.7      | 78.6        | 78.5        | 79.1     | 79       | 79.7     |
| NC_007810           | 85.1        | 85.5        | 85.5        | 86.2      | 86.2     | 86.7      | 86.7     | 86       | 88.3      | 87.1     | 87        | 87.6     | 93.3      |           | 80.7      | 79.1        | 79          | 79.3     | 80.1     | 80.5     |
| NC_026586           | 92.2        | 92          | 92          | 84.1      | 84.1     | 92.6      | 92.6     | 91.1     | 94.3      | 94.2     | 94.9      | 95       | 79.7      | 80.7      |           | 90.9        | 90.9        | 90.4     | 91.7     | 92.7     |
| MN131143            | <b>95.5</b> | 95.2        | 95.2        | 87.5      | 87.5     | 95.1      | 95.1     | 93.9     | 91.4      | 91       | 92.1      | 92.5     | 78.6      | 79.1      | 90.9      |             | 97.2        | 96.5     | 93.9     | 93.4     |
| MN131141            | <b>95.5</b> | 95.1        | 95.1        | 87        | 87       | 95.2      | 95.2     | 94.1     | 91.8      | 91.1     | 92.2      | 92.6     | 78.5      | 79        | 90.9      | 97.2        |             | 94.3     | 94.7     | 93.9     |
| MN131142            | 94.4        | 94.2        | 94.2        | 87.3      | 87.3     | 94.4      | 94.4     | 92.9     | 91.5      | 90.9     | 91.6      | 92.1     | 79.1      | 79.3      | 90.4      | 96.5        | 94.3        |          | 92.9     | 93.8     |
| MK318076            | 94.7        | 94.1        | 94.1        | 87.3      | 87.3     | 94.3      | 94.3     | 92.3     | 92.7      | 91.9     | 91.8      | 92.1     | 79        | 80.1      | 91.7      | 93.9        | 94.7        | 92.9     |          | 94.5     |
| LT594786            | 93.9        | 93.9        | 93.9        | 87.1      | 87.1     | 94.8      | 94.8     | 93.9     | 92.9      | 92.3     | 93.2      | 93.4     | 79.7      | 80.5      | 92.7      | 93.4        | 93.9        | 93.8     | 94.5     |          |

In **bold**, the five hits with the highest identity percentage. In grey is highlighted the row/column representing phage SMS29.

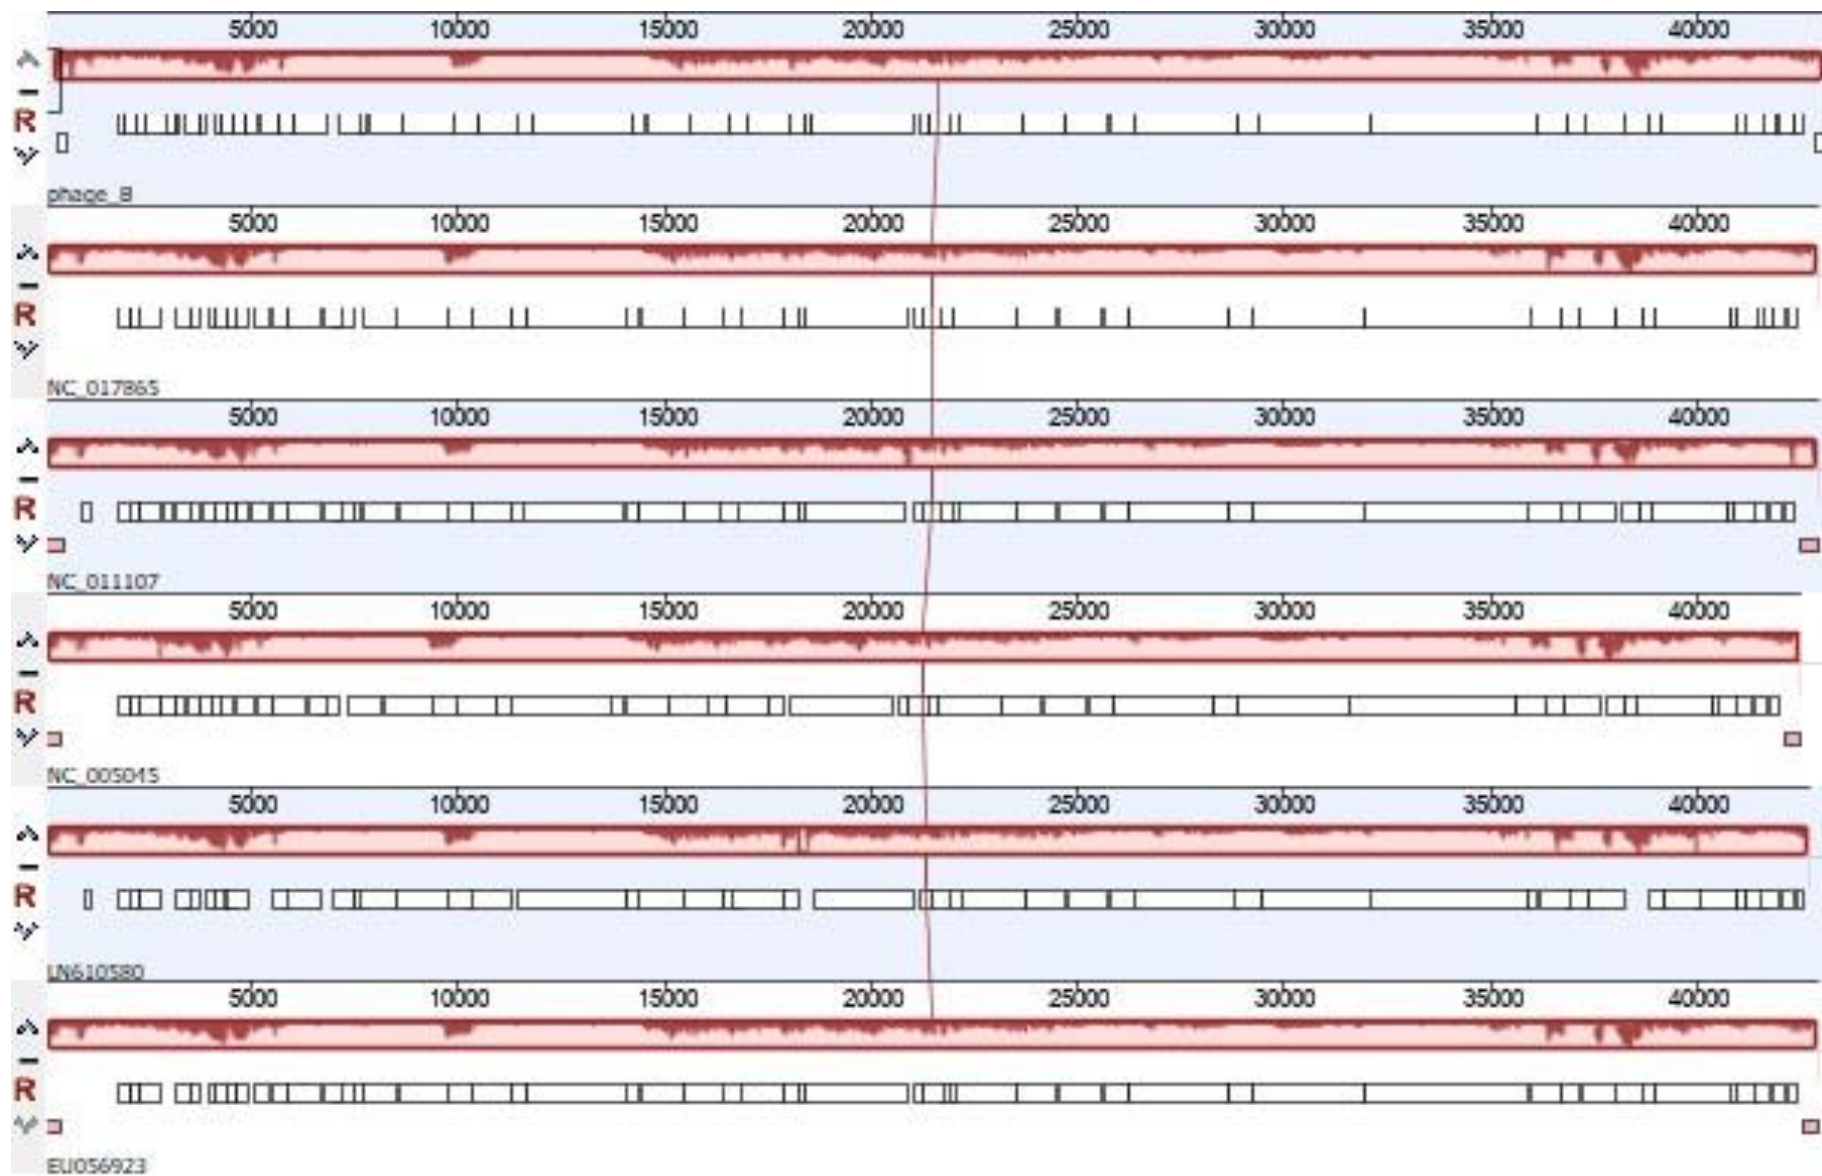

**Figure S1.** Progressive MAUVE whole-genome alignment (using MUSCLE 3.6) of phage SPCB (upper genome) with five Phikmviruses based on MAFFT alignment.

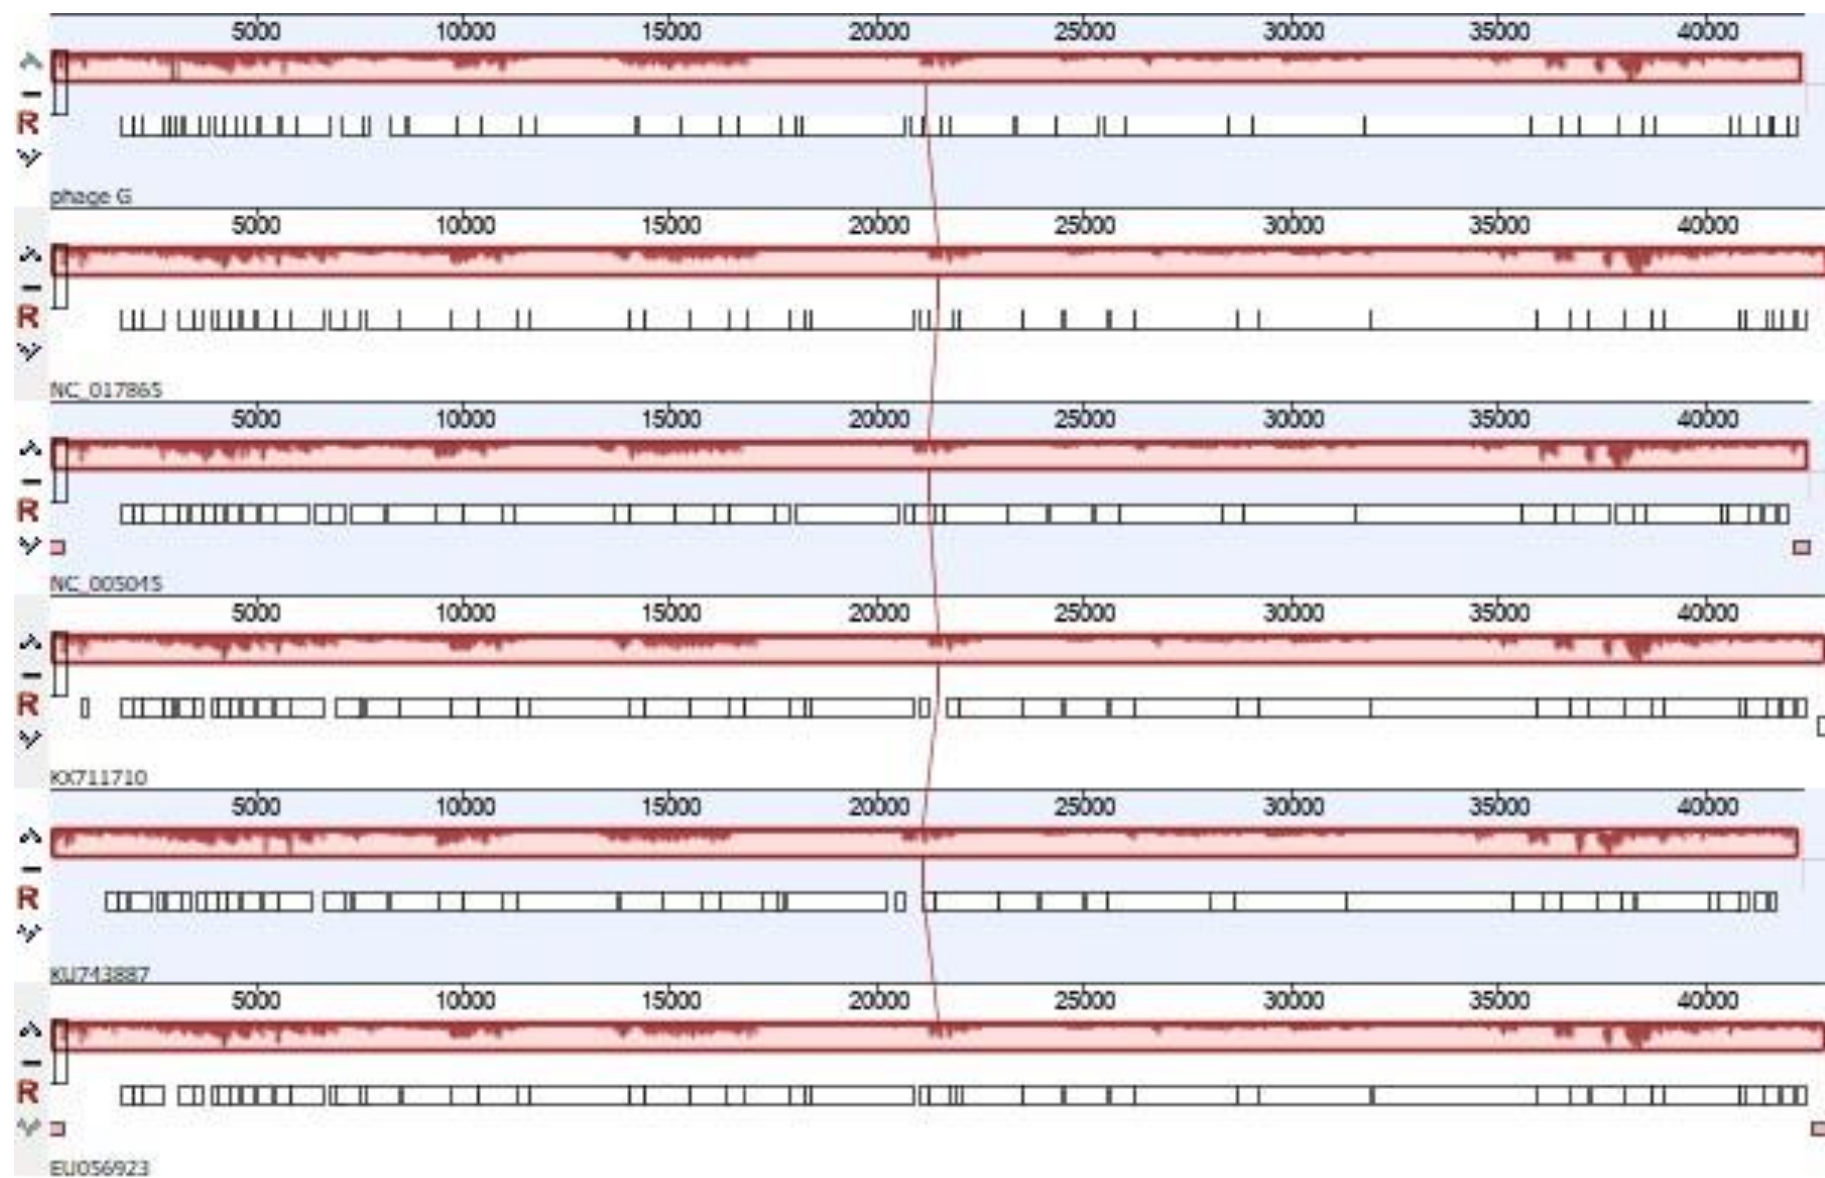

**Figure S2.** Progressive MAUVE whole-genome alignment (using MUSCLE 3.6) of phage SPCG (upper genome) with five Phikmviruses based on MAFFT alignment.



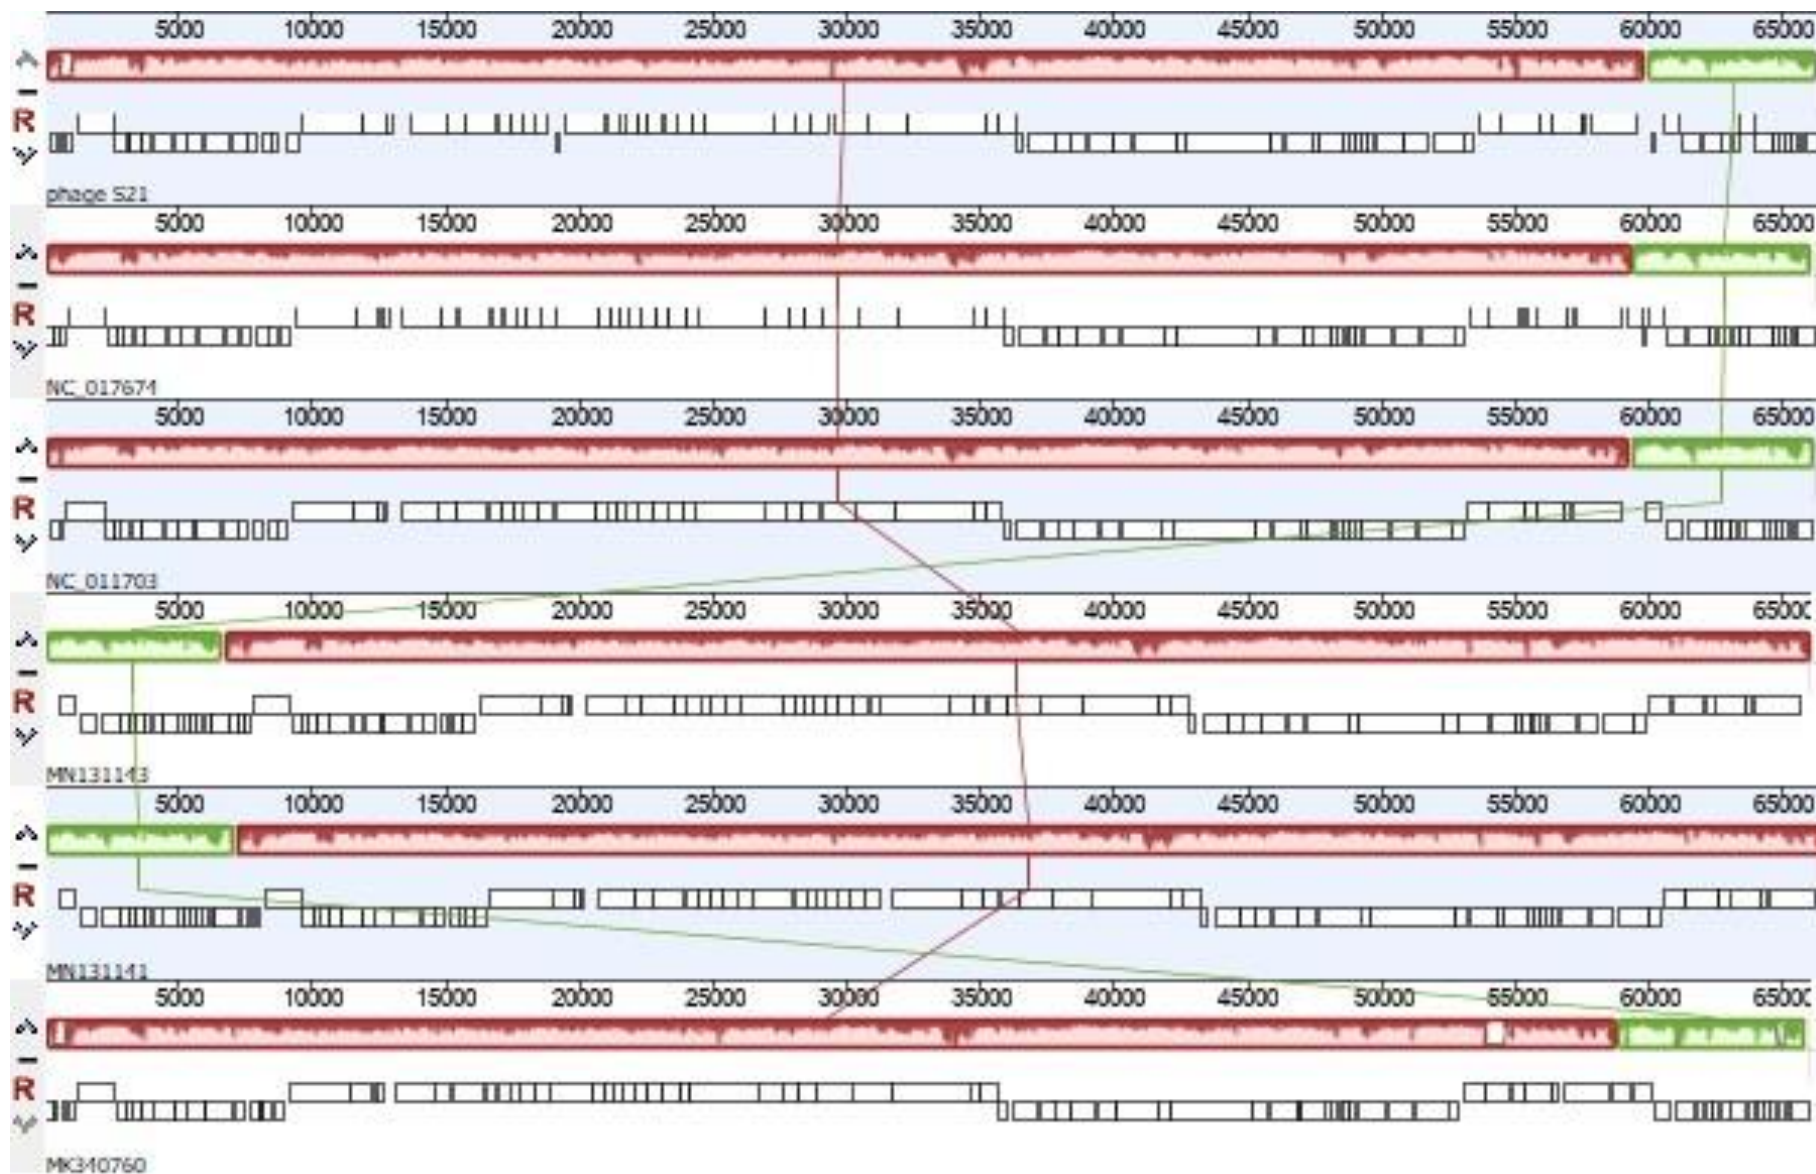

**Figure S4.** Progressive MAUVE whole-genome alignment (using MUSCLE 3.6) of phage SMS21 (upper genome) with various Pbinaviruses.

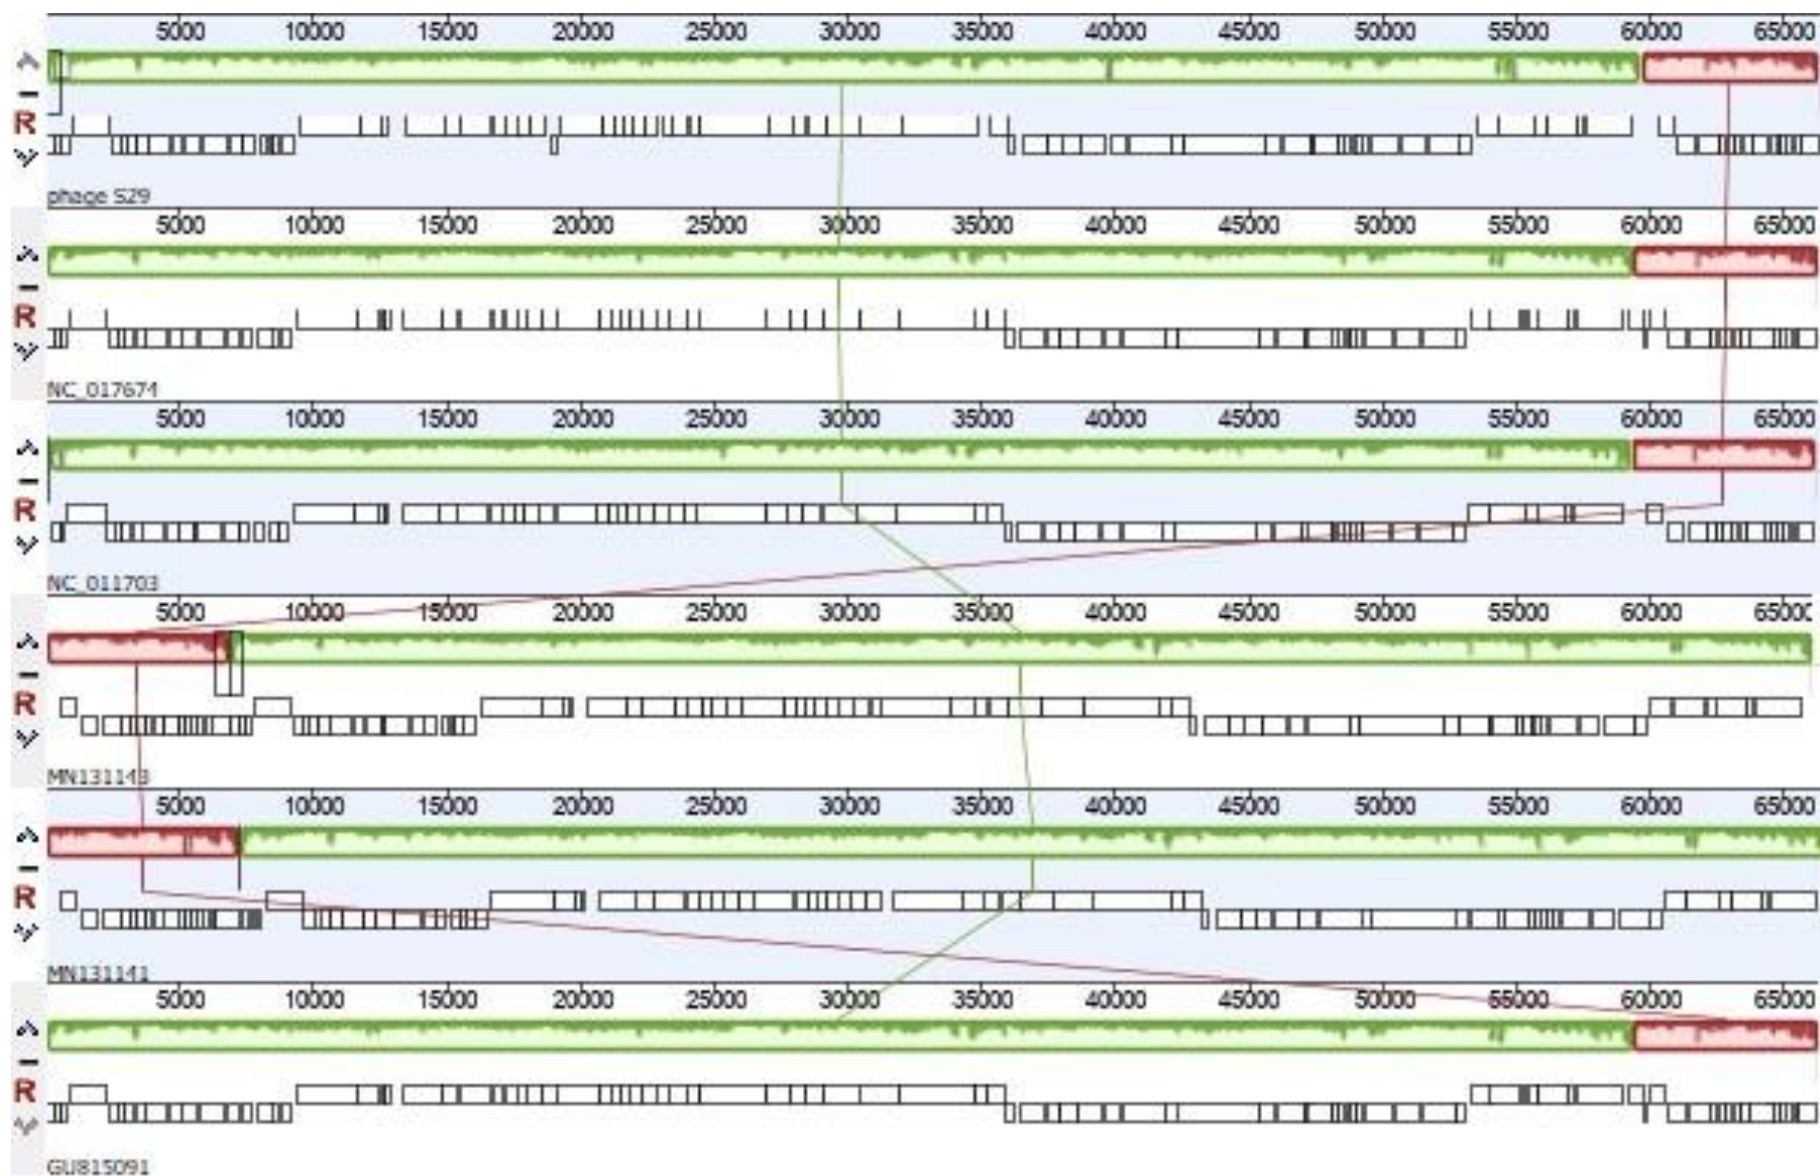

**Figure S5.** Progressive MAUVE whole-genome alignment (using MUSCLE 3.6) of phage SMS29 (upper genome) with various Pbinaviruses.
